# Supplementary material
Source: publisher figshare collection journal article supplement (https://tandf.figshare.com/articles/dataset/_/17086873)
Supplement: Supplementary file 1 [file 1]

**A**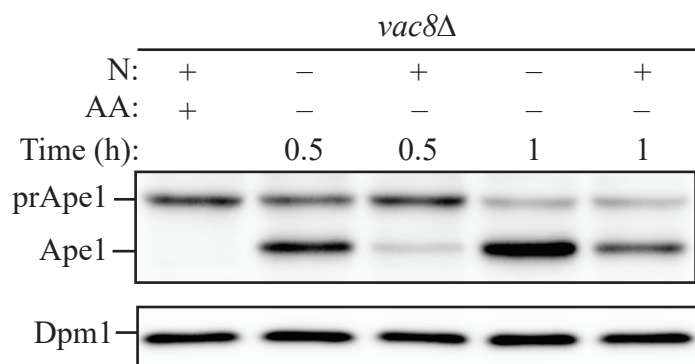**B**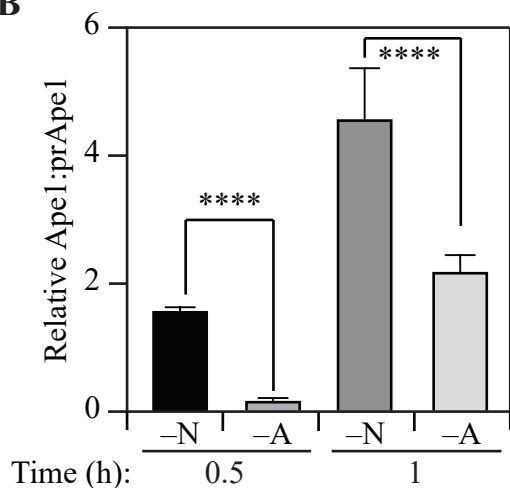**C**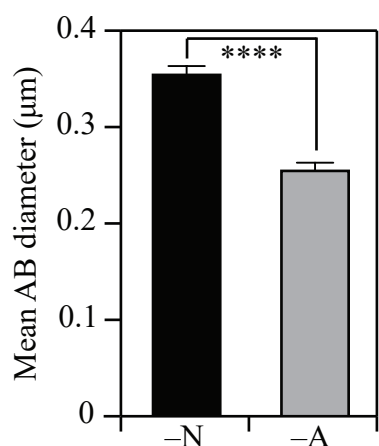**D**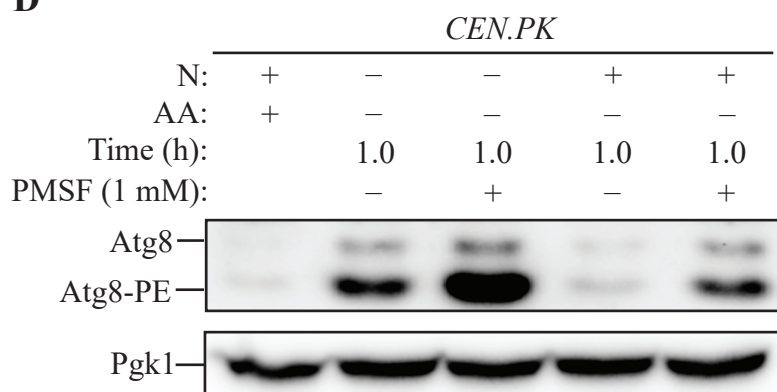**E**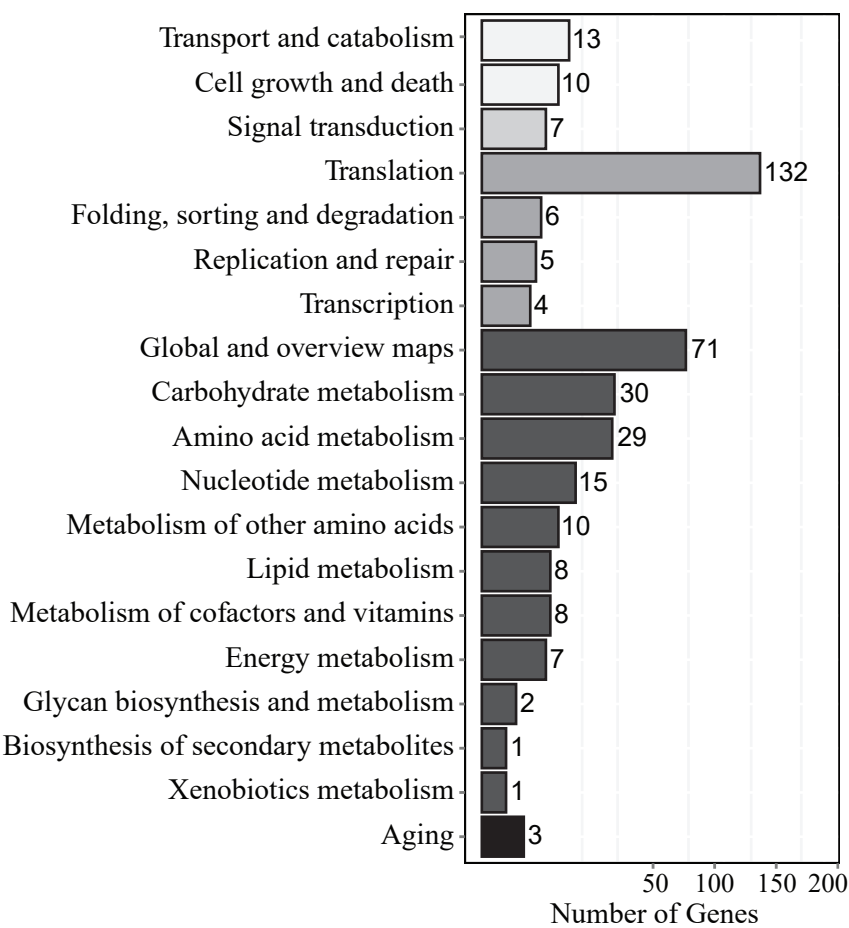**F**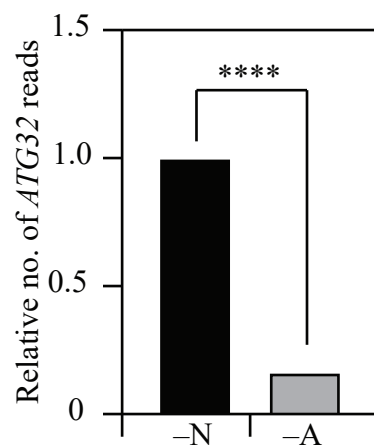**G**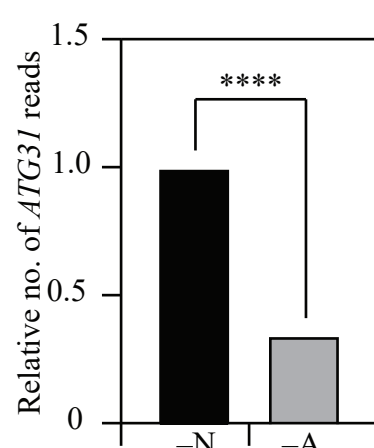**H**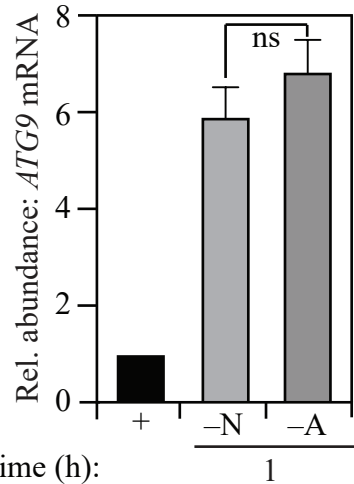**I**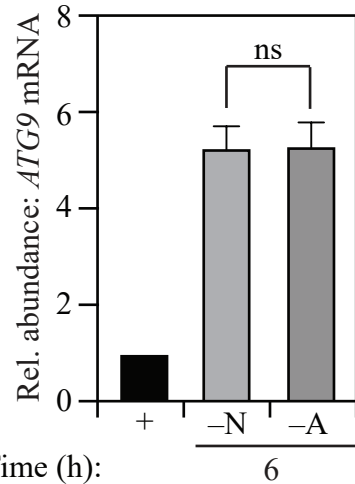

**Figure S1.** Differential autophagy flux during distinct nutrient stresses is not determined by *ATG* transcription. **(A)** Higher autophagy flux during nitrogen starvation compared to amino acid starvation, demonstrated by the precursor Ape1 (prApe1) maturation assay: SEY6210 *vac8Δ* cells were harvested in nutrient-replete conditions or after starvation for the indicated times. Conversion of prApe1 to Ape1 indicates autophagy flux. Dpm1 was used as a loading control **(B)** Densitometric analysis of (A) from three independent biological replicates. **(C)** The size of autophagosomes is larger during nitrogen starvation relative to amino acid starvation: Quantification of the diameter of autophagic bodies from SEY6210 *pep4Δ vps4Δ* cells starved for nitrogen or amino acids. Data from 100 cell profiles per condition across two independent biological replicates. **(D)** Elevated Atg8-lipidation in nitrogen starvation relative to amino acid starvation in the absence and presence of the serine protease inhibitor PMSF: CEN.PK cells were harvested in nutrient-replete conditions or after starvation for the indicated times. Pgk1 was used as a loading control. **(E)** Identified DEGs were grouped according to cellular function. **(F and G)** Abundance of *ATG32* and *ATG31* transcripts is significantly lower in amino acid starvation relative to nitrogen starvation as determined by RNA-Sequencing. Data represent the mean of three independent biological replicates. **(H and I)** Transcriptional upregulation of *ATG9* is similar during nitrogen and amino acid starvation: qRT-PCR-based detection of *ATG9* mRNA in WT (SEY6210) cells after 1 h (H) or 6 h (I) of starvation. *ALG9* was used as a reference gene for normalization. Data are from three independent biological replicates. Data in (B), (C), (H) and (I) represent mean  $\pm$  SEM from indicated number of replicates. Statistical analysis for (B) was carried out using one-way analysis of variance (ANOVA) while (C), (H) and (I) were analyzed using an unpaired Student's t-test. Data in (F) and (G) represent mean from indicated number of replicates. Statistical analysis for (F) and (G) was carried out using one-way analysis of variance (ANOVA). Multiple comparisons were carried out using Tukey's multiple comparisons test. \* $p < 0.05$ , \*\* $p < 0.005$ , \*\*\* $p < 0.001$ , \*\*\*\* $p < 0.0001$  ns: not significant. Related to Figure 1.

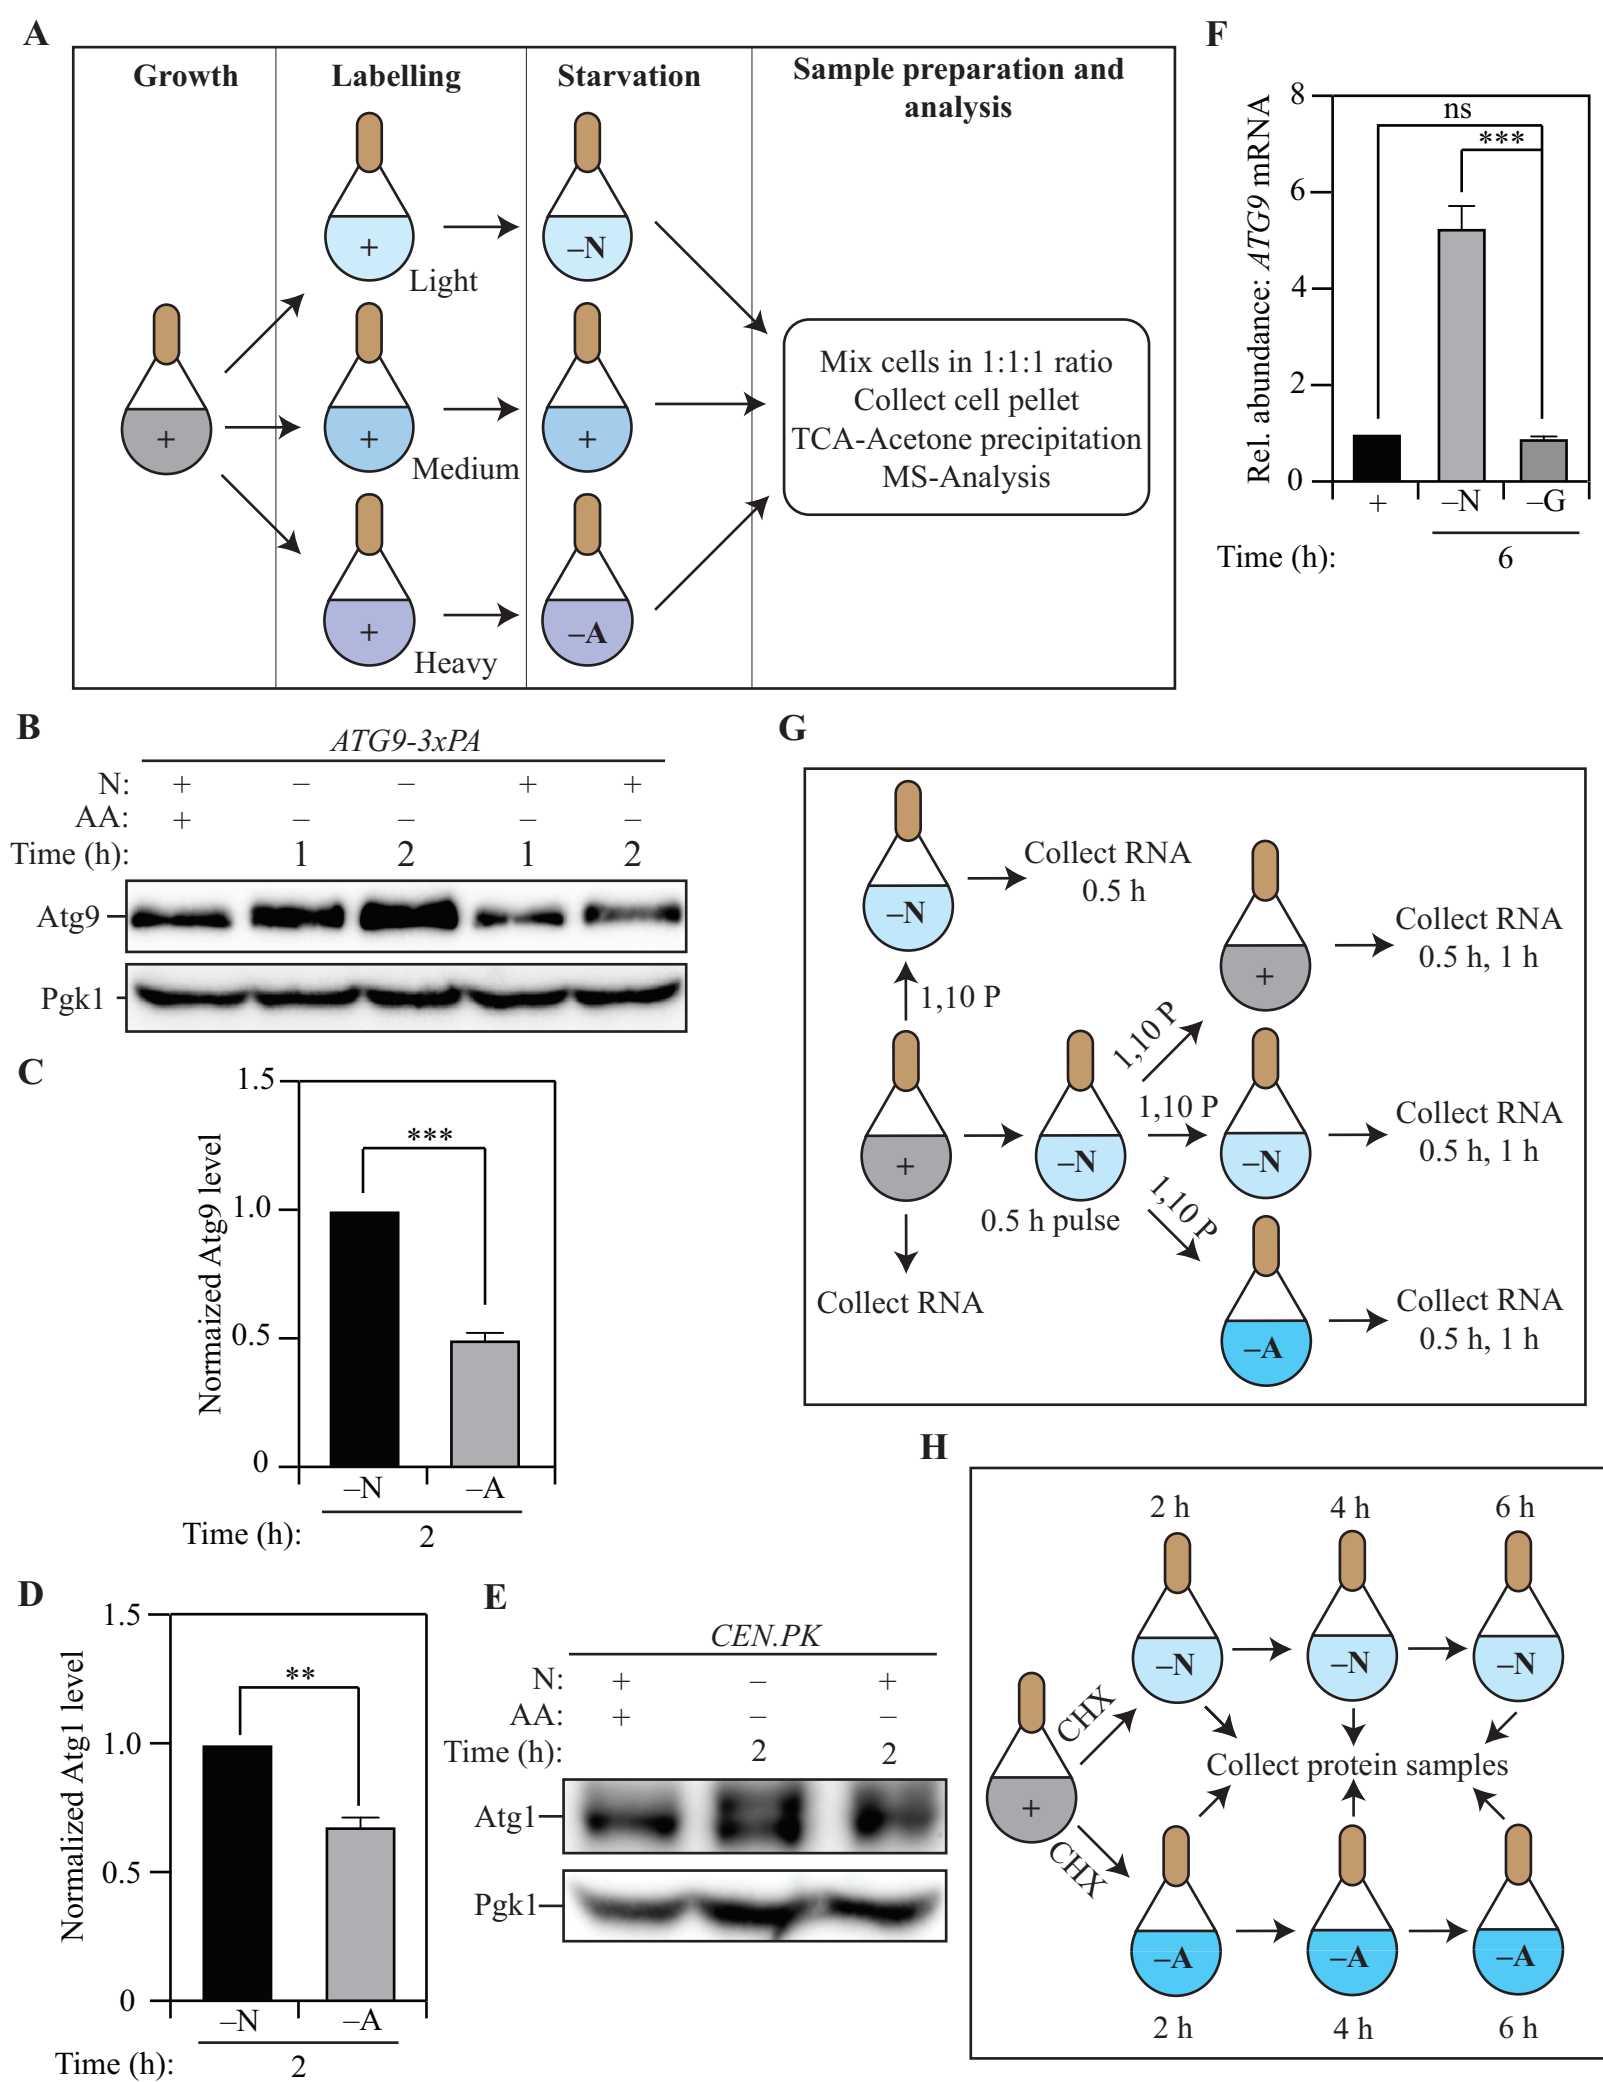

**Figure S2.** Post-transcriptional activation of *ATG* gene expression is a critical node determining autophagy during nitrogen starvation. **(A)** Scheme of the triplex SILAC experiment. “Light”, “Medium” and “Heavy” refer to the nature of arginine and lysine isotopes present in the media. Across different biological replicates, the nature of the medium used for growing cells for each treatment (nutrient-replete, nitrogen starvation or amino acid starvation) was alternated. **(B)** Atg9 levels are higher during nitrogen starvation compared to amino acid starvation: WT (SEY6210) cells were harvested in nutrient-replete conditions or after starvation for the indicated times and Atg9 protein levels were assessed by western blot. Pgk1 was used as a loading control. **(C)** Densitometric analysis of **(B)** from three independent biological replicates. **(D)** Densitometric analysis of Atg1 levels in WT cells after 2 h of nitrogen or amino acid starvation (from Figure 2B) from three independent biological replicates. **(E)** Atg1 levels increase substantially more during nitrogen versus amino acid starvation: CEN.PK cells were harvested in nutrient-replete conditions or after starvation for the indicated times and protein levels analyzed by western blot. Pgk1 was used as a loading control. **(F)** Transcriptional upregulation of *ATG9* mRNA occurs during nitrogen, but not glucose, starvation: qRT-PCR-based detection of *ATG9* mRNA in WT cells after 1 h of starvation. *ALG9* was used as a reference gene for normalization. Data are from three independent biological replicates. **(G)** Schematic for *ATG1* mRNA stability assay by 1,10-phenanthroline (1,10 P) chase (Figure 2G). **(H)** Schematic for Atg1 stability assay by cycloheximide chase (Figures 2H and 2I). Data in **(C)**, **(D)** and **(F)** represent mean  $\pm$  SEM from indicated number of replicates. Statistical analysis for **(C)** and **(D)** was carried out using an unpaired Student’s t-test while **(F)** was analyzed using one-way analysis of variance (ANOVA). Multiple comparisons were carried out using Tukey’s multiple comparisons test.  $p < 0.05$ , \*\* $p < 0.005$ , \*\*\* $p < 0.001$ , \*\*\*\* $p < 0.0001$  ns: not significant. Related to Figure 2.

**A**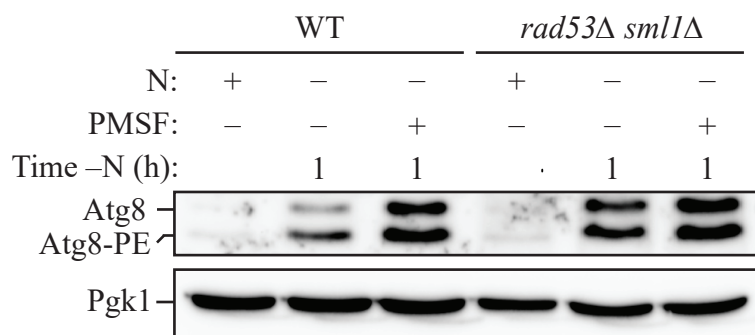**B**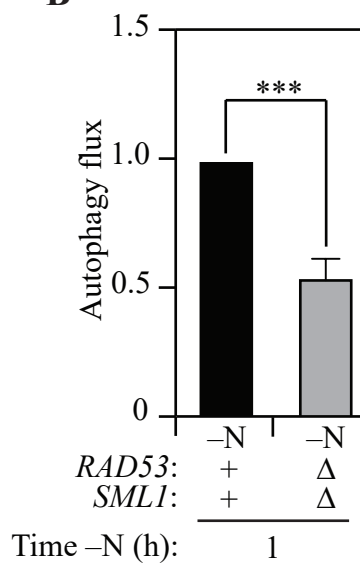**C**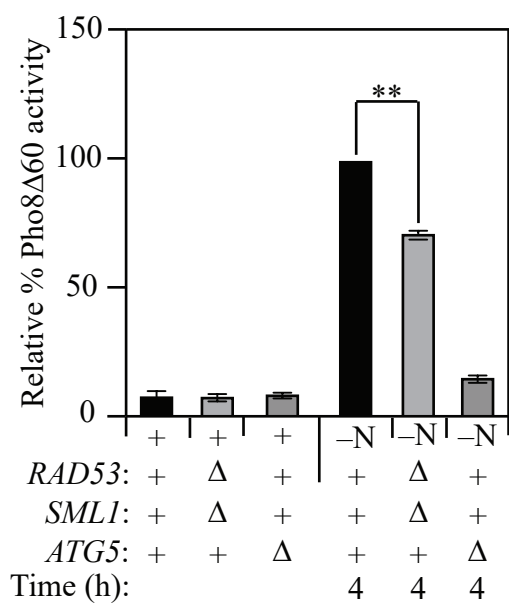**D**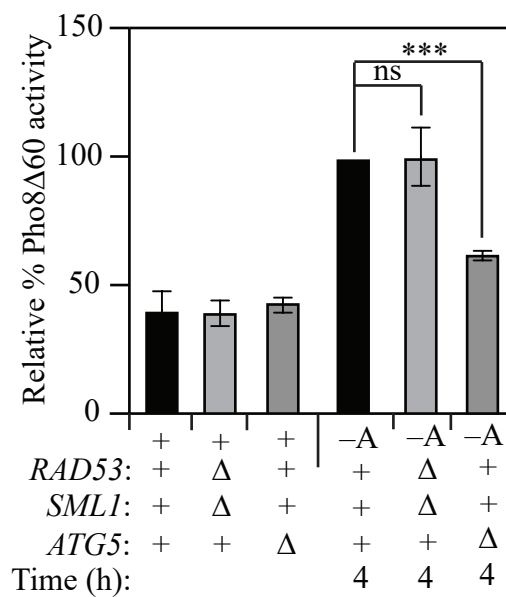**E**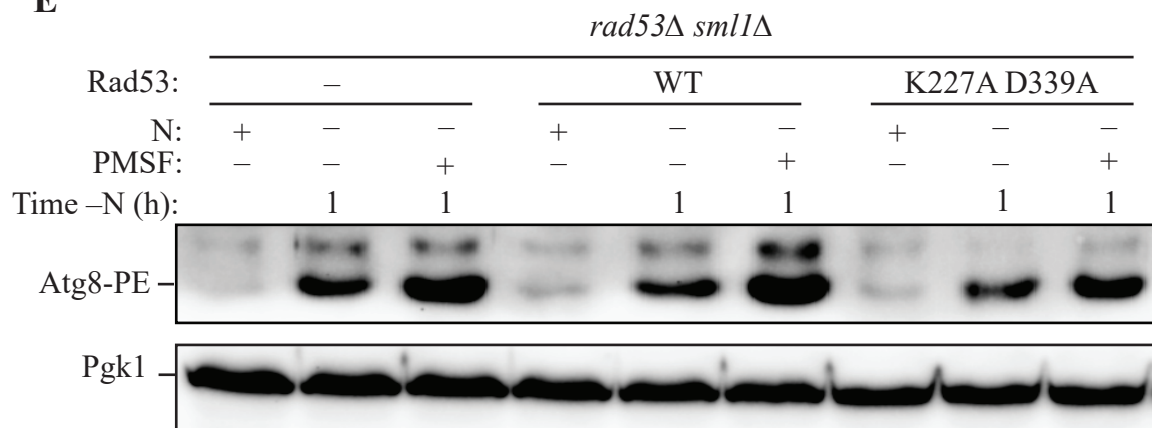**F**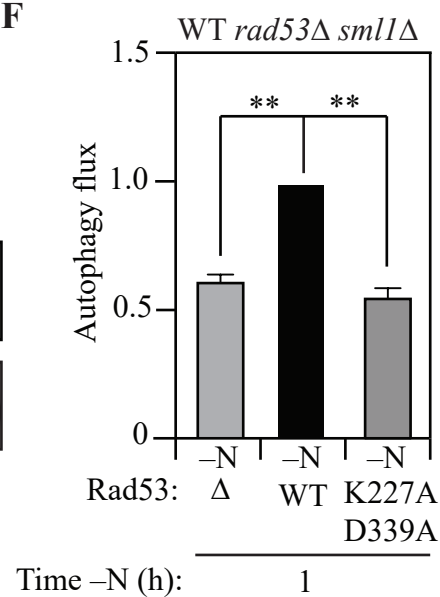

**Figure S3.** Post-transcriptional regulation of *ATG1* expression by Rad53 facilitates nitrogen starvation-induced autophagy. **(A and B)** The loss of Rad53 function reduces autophagy flux during nitrogen starvation but not amino acid starvation, as demonstrated by the Pho8Δ60 assay: WT (WLY176) and *rad53Δ sml1Δ* cells were harvested during nutrient-replete conditions or after nitrogen starvation (A) or amino acid starvation (B) for the indicated times. Pho8Δ60 enzyme activity was measured by colorimetry. An increase in Pho8Δ60 activity indicates increased autophagic flux. Negative control: SEY6210 *atg5Δ* cells. Data from three independent biological replicates. **(C)** The loss of Rad53 function impairs autophagy during nitrogen starvation as demonstrated by the Atg8-lipidation assay: WT (SEY6210) and *rad53Δ sml1Δ* cells were harvested during nutrient-replete conditions or after starvation with or without PMSF treatment. Increased Atg8–PE accumulation upon PMSF treatment (relative to no treatment control) indicates autophagy flux. **(D)** Densitometric analysis of (C) from three independent biological replicates. **(E)** Abolishing Rad53 kinase activity reduces autophagy flux during nitrogen starvation: WLY176 *rad53Δ sml1Δ* cells expressing either Rad53 or Rad53<sup>K227A,D339A</sup> (kinase dead Rad53) from a centromeric plasmid were harvested during nutrient-replete conditions or after starvation with or without PMSF treatment. Increased Atg8–PE accumulation upon PMSF treatment (relative to the no-treatment control) indicates autophagy flux. **(F)** Densitometric analysis of (E) from three independent biological replicates. Data in (A), (B), (D) and (F) represent mean ± SEM from the indicated number of replicates. Statistical analysis for (A) and (B) was carried out using two-way analysis of variance (ANOVA) while (D) was analyzed using an unpaired Student's t-test. Statistical analysis for (F) was carried out using one-way analysis of variance (ANOVA). Multiple comparisons were carried out using Tukey's multiple comparisons test. \**p* < 0.05, \*\**p* < 0.005, \*\*\**p* < 0.001, \*\*\*\**p* < 0.0001 ns: not significant. Related to Figure 3.

**A**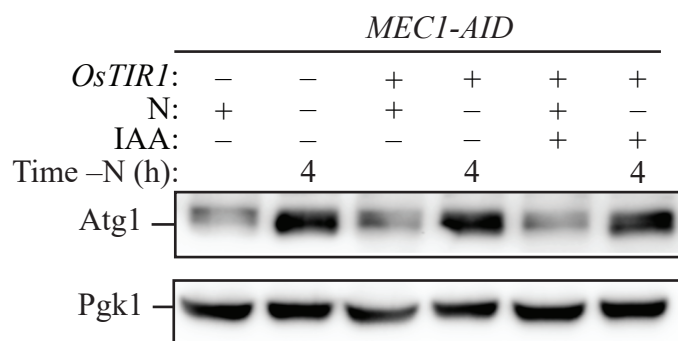**B**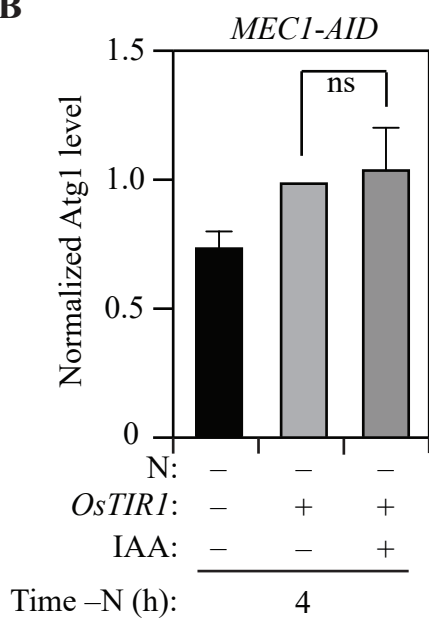**C**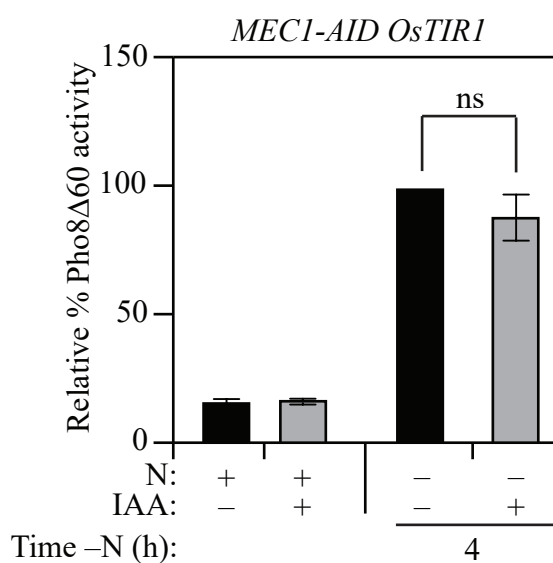**E**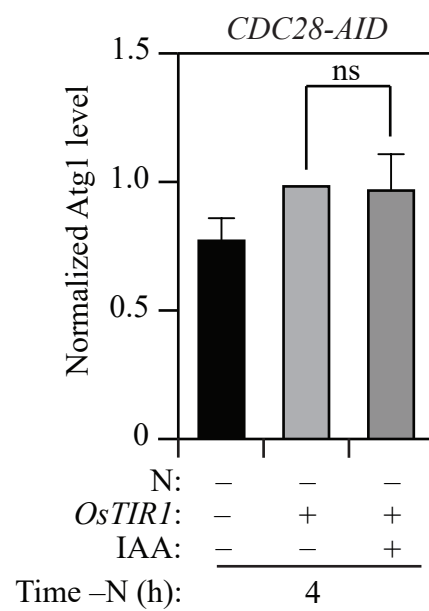**F**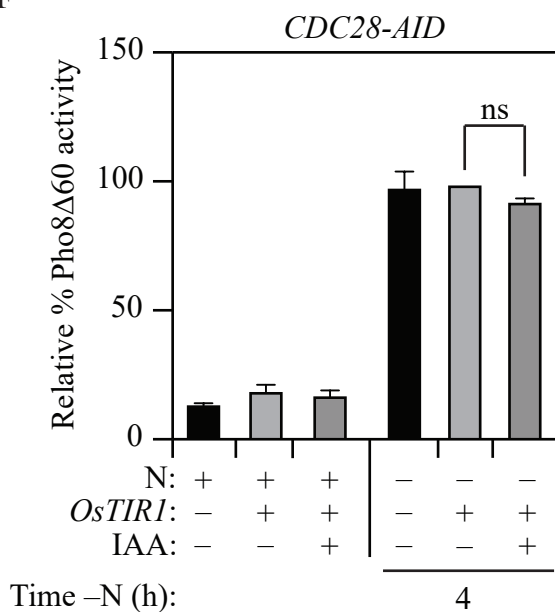**G**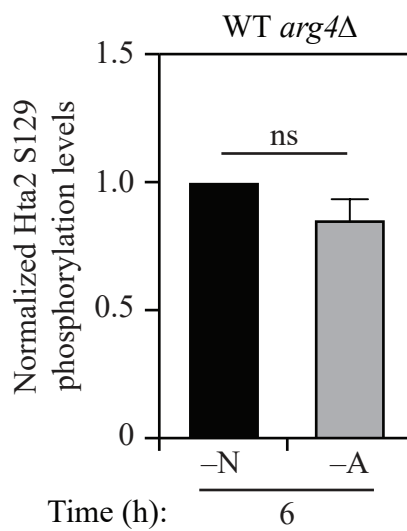**H**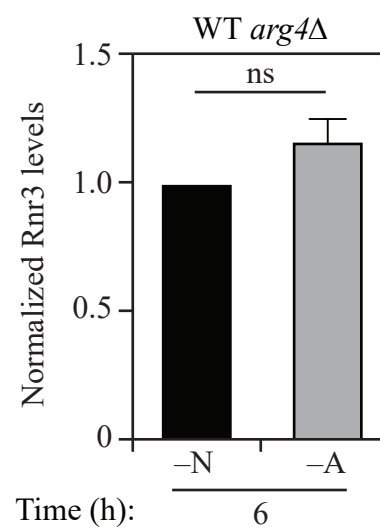**D**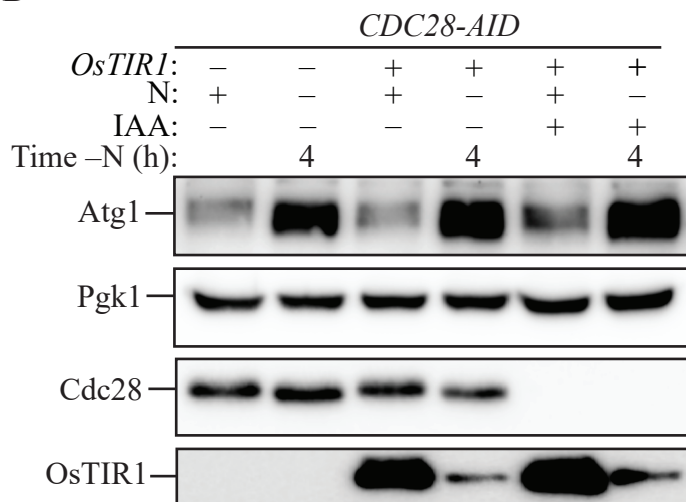

**Figure S4.** Mec1 and Cdc28 are not involved in Rad53 activation during nitrogen starvation-induced autophagy. Mec1 and Cdc28 are not involved in Rad53 activation during nitrogen starvation-induced autophagy. (A) The acute loss of Mec1 has no effect on Atg1 expression during nitrogen starvation: WT (WLY176) *CUP1p-GFP-ATG8 MEC1-AID* cells without OsTIR1 expression and WT *CUP1p-GFP-ATG8 MEC1-AID OsTIR1* cells were harvested during nutrient-replete conditions or after nitrogen starvation with or without IAA treatment. Atg1 proteins levels were examined by western blot. Pgk1 was used as a loading control. (B) Densitometric analysis of three independent biological replicates from (A). (C) The acute loss of Mec1 does not affect autophagy flux during nitrogen starvation: WLY176 *CUP1p-GFP-ATG8 MEC1-AID OsTIR1* cells were harvested as in (A) and Pho8Δ60 enzyme activity was measured by colorimetry. An increase in Pho8Δ60 activity indicates increased autophagic flux. Data from three independent biological replicates. (D) The acute loss of Cdc28 has no effect on Atg1 expression: WT *CUP1p-GFP-ATG8 CDC28-AID* cells without OsTIR1 expression and WT *CUP1p-GFP-ATG8 CDC28-AID OsTIR1* cells were harvested and examined as in (A). Pgk1 was used as a loading control. (E) Densitometric analysis of three independent biological replicates from (D). (F) The acute loss of Cdc28 does not affect autophagy flux during nitrogen starvation: WLY176 *CUP1p-GFP-ATG8 CDC28-AID OsTIR1* cells were harvested and measured as in (C). Data from three independent biological replicates. (G and H) No differential DNA damage in nitrogen starvation relative to amino acid starvation. Hta2 S129 phosphorylation levels (G) and Rnr3 levels (H) are similar during nitrogen and amino acid starvation (see text for details). Data in (B), (C), and (E-H) represent the mean ± SEM from the indicated number of replicates. Statistical analysis for (B) and (E) was carried out using one-way analysis of variance (ANOVA). Statistical analysis for (C) and (F) was carried out using two-way analysis of variance (ANOVA). Statistical analysis for (G) and (H) was carried out using Unpaired t-test. Multiple comparisons were carried out using Tukey's multiple comparisons test. \*p < 0.05, \*\*p < 0.005, \*\*\*p < 0.001, \*\*\*\*p < 0.0001, ns: not significant. Related to Figure 3.



**A**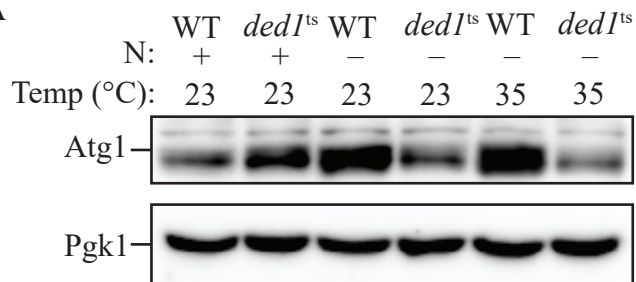**D**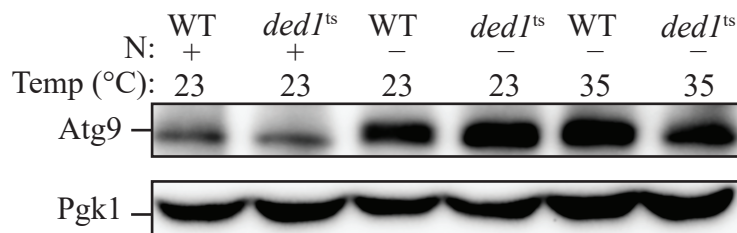**B**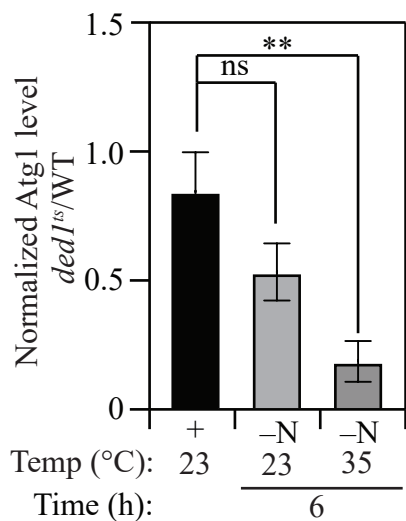**C**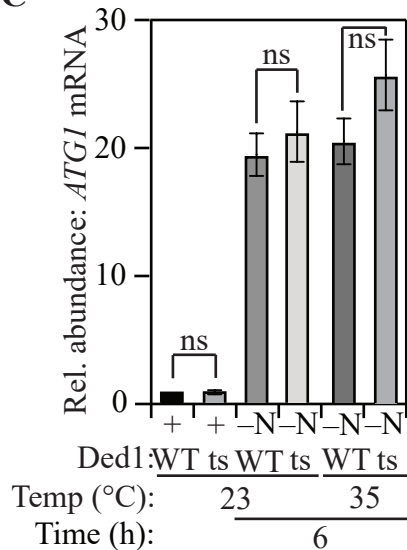**E**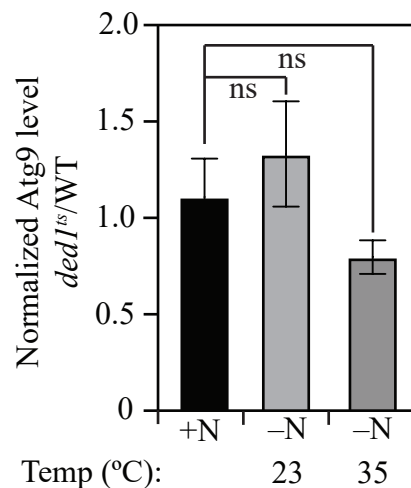**F**

|              | <i>DED1-AID-MYC</i> |   |   |   |   |   |
|--------------|---------------------|---|---|---|---|---|
| OsTIR1:      | -                   | - | + | + | + | + |
| N:           | +                   | - | + | - | + | - |
| IAA:         | -                   | - | - | - | + | + |
| Time -N (h): | 0                   | 4 | 0 | 4 | 0 | 4 |

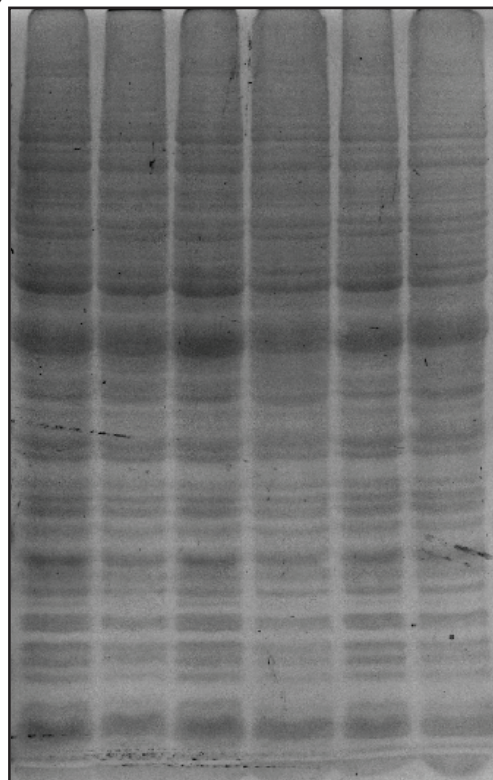**H**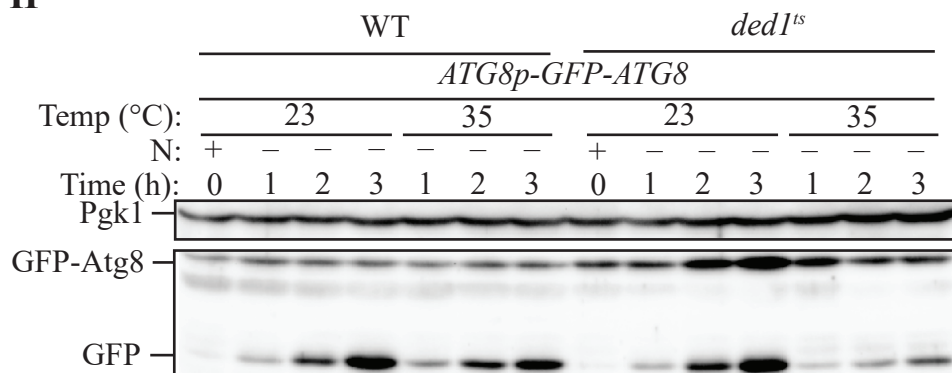**G**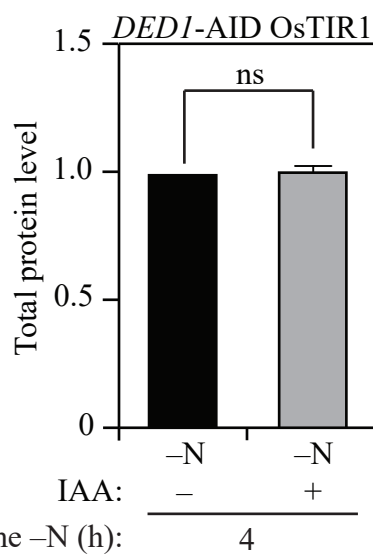**I**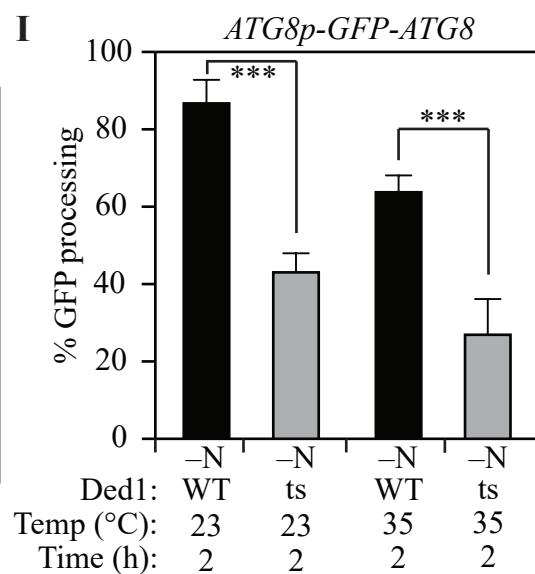

**Figure S5.** Ded1 regulates Atg1 expression and autophagy in yeast. **(A)** The loss of Ded1 activity impairs Atg1 expression during nitrogen starvation: WT (SEY6210) or *ded1<sup>ts</sup>* (non-permissive temperature: 35°C) strains were harvested during nutrient-replete conditions or after nitrogen starvation at 23°C or 35°C. Atg1 levels were examined using western blot. Pgk1 was used as a loading control. **(B)** Densitometric analyses of Atg1 expression in *ded1<sup>ts</sup>* relative to SEY6210 from three independent biological replicates. **(C)** The loss of Ded1 activity has no effect on *ATG1* transcription during nitrogen starvation: Strains and conditions as in (A) were used to measure the levels of *ATG1* mRNA by qRT-PCR. *ALG9* was used as a reference gene for normalization. Data from three independent biological replicates. **(D)** The loss of Ded1 activity has no effect on Atg9 expression: WT (SEY6210) or *ded1<sup>ts</sup>* strains were harvested as in (A). Atg9 levels were examined using western blot. Pgk1 was used as a loading control. **(E)** Densitometric analyses of Atg9 expression in *ded1<sup>ts</sup>* relative to the WT (SEY6210) from three independent biological replicates. **(F)** Total protein profile reveals that the loss of Ded1 activity does not promote changes in general translation during nitrogen starvation: WT (WLY176) *CUP1p-GFP-ATG8 DED1-AID* cells without OsTIR1 expression and WT (WLY176) *CUP1p-GFP-ATG8 DED1-AID OsTIR1* cells harvested during nutrient-replete conditions or after nitrogen starvation with or without IAA treatment. Proteins were stained using Coomassie Brilliant Blue. **(G)** Total protein quantified by densitometric analysis of five prominent bands from the total profile across three independent biological replicates. **(H)** The loss of Ded1 activity impairs autophagy flux during nitrogen starvation, assessed by GFP-Atg8 processing: WT (SEY6210) or *ded1<sup>ts</sup>* (non-permissive temperature: 35°C) cells were transformed with an *ATG8p-GFP-ATG8* plasmid (expressing *ATG8* under the endogenous promoter) and harvested in nutrient-replete conditions or after starvation for the indicated times at either 23°C or 35°C. Proteins were examined by western blot. The appearance of free GFP indicates autophagy flux. Pgk1 was used as a loading control. **(I)** Densitometric analysis from three independent biological replicates. Data in (B), (C), (E), (G) and (I) represent the mean  $\pm$  SEM from the indicated number of replicates. Statistical analysis for (B), (C), (E) and (I) was carried out using one-way analysis of variance (ANOVA). Statistical analysis for (G) was carried out using an unpaired Student's t-test. Multiple comparisons were carried out using Tukey's multiple comparisons test. \* $p < 0.05$ , \*\* $p < 0.005$ , \*\*\* $p < 0.001$ , \*\*\*\* $p < 0.0001$  ns: not significant. Related to Figure 5.

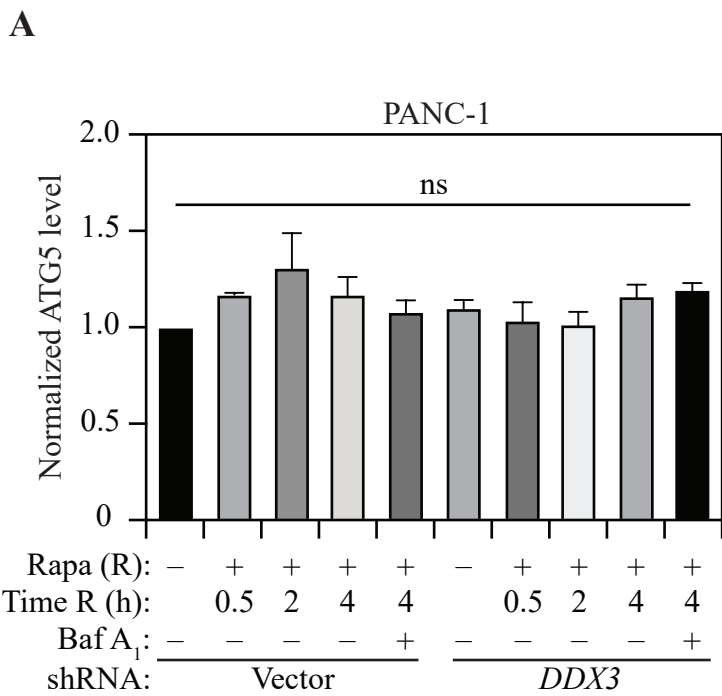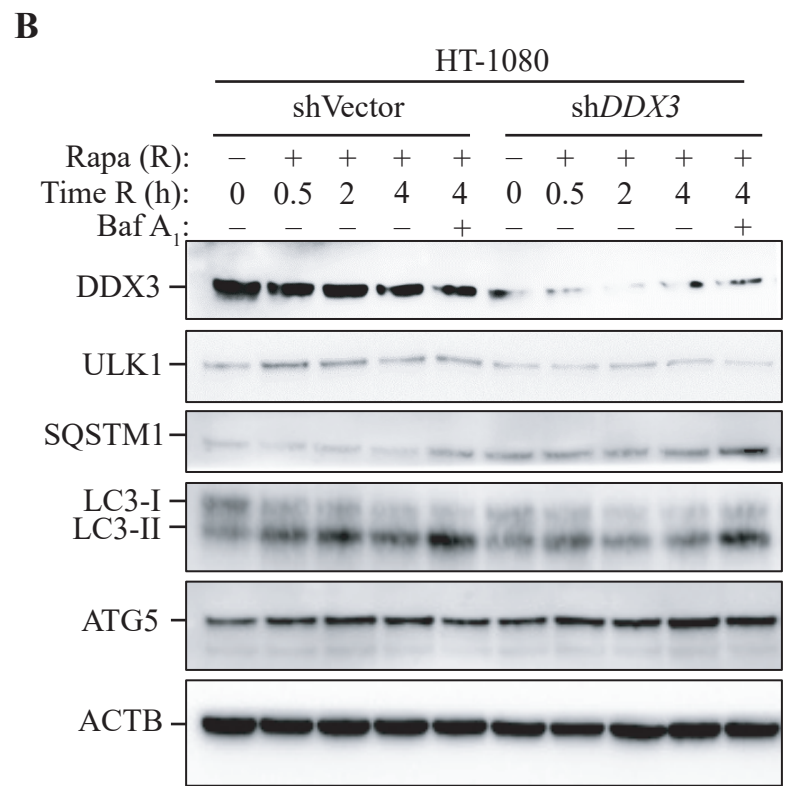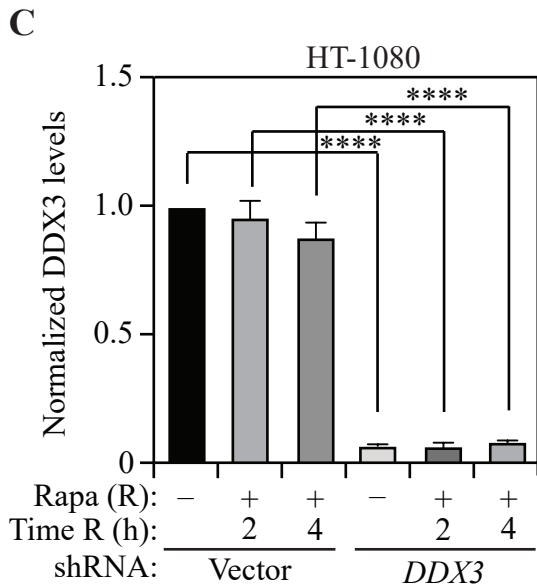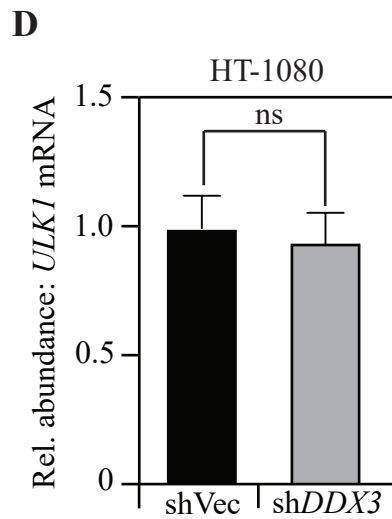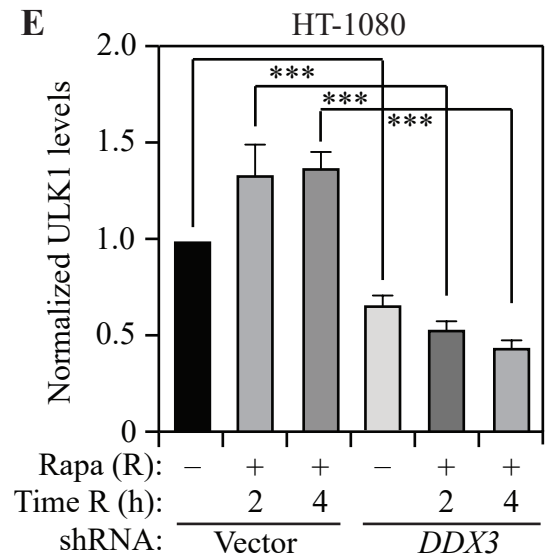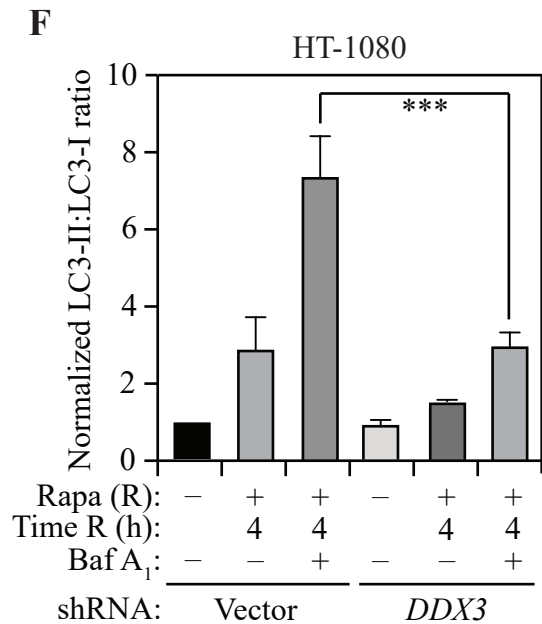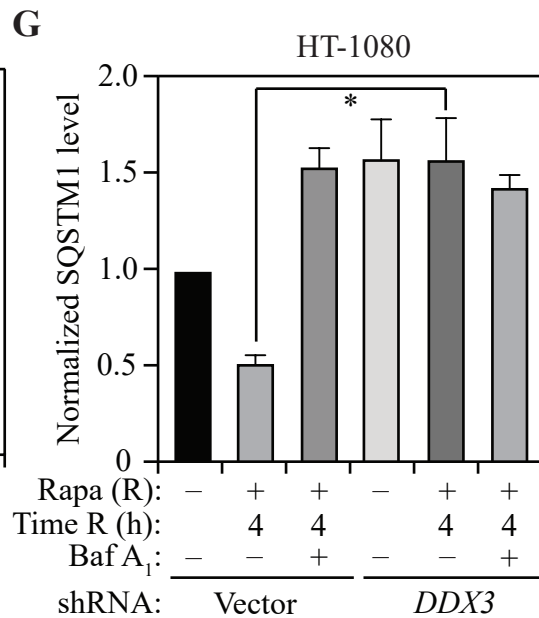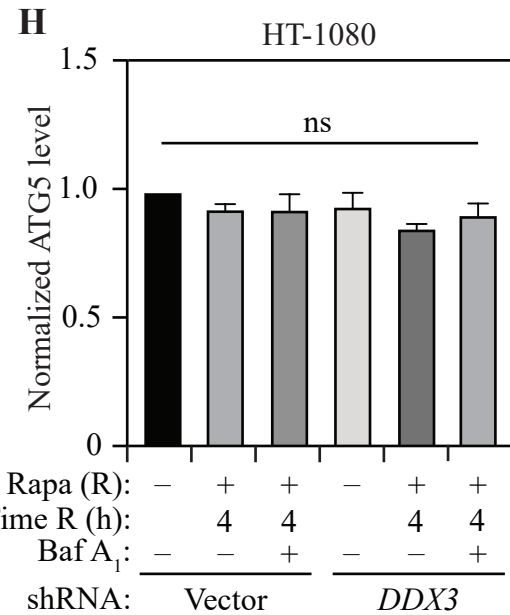

**Figure S6.** DDX3 regulates autophagy in mammalian cells. **(A)** The loss of DDX3 has no effect on ATG5 expression: PANC-1 cells, stably transfected with either vector shRNA (control) or shRNA targeting *DDX3*, were treated with rapamycin (Rapa) for the indicated times with or without co-treatment with bafilomycin A<sub>1</sub> (Baf A<sub>1</sub>). Normalized ATG5 level at the indicated time points with the indicated treatments. **(B)** The loss of DDX3 impairs ULK1 expression and autophagy in mammalian cells: HT-1080 cells, stably transfected with either vector shRNA (control) or shRNA targeting *DDX3*, were treated with rapamycin for the indicated times with or without co-treatment with bafilomycin A<sub>1</sub>. A representative blot shows the levels of DDX3, ULK1, SQSTM1, LC3-I and LC3-II, and ATG5 with ACTB as a loading control, upon harvesting cells at the indicated time points after rapamycin treatment. **(C)** Normalized DDX3 levels at the indicated time points with the indicated treatments. Data represent three independent biological replicates. **(D)** Relative abundance of *ULK1* mRNA in sh*DDX3* cells compared to control cells. *GAPDH* was used as a reference gene. Data represent three independent biological replicates. **(E)** Normalized DDX3 levels at the indicated time points with the indicated treatments. Data represent three independent biological replicates. **(F, G and H)** Normalized LC3-II:LC3-I ratio (F), normalized SQSTM1 level (G) and normalized ATG5 level (H) at the indicated time points with the indicated treatments. Decreased LC3-II:LC3-I (F) ratio in the presence of bafilomycin A<sub>1</sub> indicates reduced autophagy flux. An increased SQSTM1 accumulation (G) indicates reduced autophagy flux. Data represent three independent biological replicates. Data in (A), and (C-H) represent mean  $\pm$  SEM from the indicated number of replicates. Statistical analysis for (A), (C), and (E-H) was carried out using one-way analysis of variance (ANOVA) while (D) was analyzed using an unpaired Student's t-test. Multiple comparisons were carried out using Tukey's multiple comparisons test. \* $p < 0.05$ , \*\* $p < 0.005$ , \*\*\* $p < 0.001$ , \*\*\*\* $p < 0.0001$  ns: not significant. Related to Figure 6.

**Table 1.** Yeast strains used in this study.

| Strain  | Genotype                                                                                                                                         | Reference  |
|---------|--------------------------------------------------------------------------------------------------------------------------------------------------|------------|
| SEY6210 | <i>MAT<math>\alpha</math> leu2-3,112 ura3-52 his3-<math>\Delta</math>200 trp1-<math>\Delta</math>901 suc2-<math>\Delta</math>9 lys2-801; GAL</i> | [61]       |
| VLY001  | SEY6210 <i>GCN4-3xPA::TRP1</i>                                                                                                                   | This study |
| VLY002  | WLY176 <i>CUP1p-GFP-ATG8::LEU2</i>                                                                                                               | This study |
| VLY003  | SEY6210 <i>pep4<math>\Delta</math>::KAN</i>                                                                                                      | This study |
| VLY004  | SEY6210 <i>pep4<math>\Delta</math>::KAN vps4<math>\Delta</math>::LEU2</i>                                                                        | This study |
| VLY005  | SEY6210 <i>vac8<math>\Delta</math>::KAN</i>                                                                                                      | This study |
| VLY006  | SEY6210 <i>arg4<math>\Delta</math>::HIS</i>                                                                                                      | This study |
| VLY007  | SEY6210 <i>ATG9-3xPA::TRP1</i>                                                                                                                   | This study |
| VLY008  | SEY6210 <i>atg1<math>\Delta</math>::HIS3</i>                                                                                                     | This study |
| VLY009  | SEY6210 <i>sml1<math>\Delta</math>::HIS3</i>                                                                                                     | This study |
| VLY010  | SEY6210 <i>sml1<math>\Delta</math>::HIS3 rad53<math>\Delta</math>::URA3</i>                                                                      | This study |
| VLY011  | SEY6210 <i>PGII-GFP::TRP1</i>                                                                                                                    | [58]       |
| VLY012  | SEY6210 <i>sml1<math>\Delta</math>::HIS3 PGII-GFP::TRP1</i>                                                                                      | This study |
| VLY013  | SEY6210 <i>sml1<math>\Delta</math>::HIS3 rad53<math>\Delta</math>::URA3 PGII-GFP::TRP1</i>                                                       | This study |
| VLY014  | WLY176 <i>RAD53-AID-MYC::HIS3</i>                                                                                                                | This study |
| VLY015  | VLY014 <i>pNHK53::URA3</i>                                                                                                                       | This study |
| VLY016  | VLY002 <i>MEC1-AID-MYC::HIS3</i>                                                                                                                 | This study |
| VLY017  | VLY016 <i>pNHK53::URA3</i>                                                                                                                       | This study |
| VLY018  | VLY002 <i>CDC28-AID-MYC::HIS3</i>                                                                                                                | This study |
| VLY019  | VLY018 <i>pNHK53::URA3</i>                                                                                                                       | This study |
| VLY020  | SEY6210 <i>DED1-3xPA::TRP1</i>                                                                                                                   | This study |
| VLY021  | SEY6210 <i>DED1-13xMYC::HIS3</i>                                                                                                                 | This study |
| VLY022  | VLY010 <i>DED1-13xMYC::HIS3</i>                                                                                                                  | This study |
|         | <i>ded1-95</i>                                                                                                                                   | [113]      |
| VLY022  | VLY002 <i>DED1-AID-MYC::HIS3</i>                                                                                                                 | This study |
| VLY023  | VLY022 <i>pNHK53::URA3</i>                                                                                                                       | This study |

|        |                                     |            |
|--------|-------------------------------------|------------|
| VLY024 | VLY004 <i>DED1-AID-MYC::HIS3</i>    | This study |
| VLY025 | VLY024 <i>pNHK53::URA3</i>          | This study |
| WLY176 | SEY6210 <i>pho13Δ pho8::pho8Δ60</i> | [30]       |

## Primers used in this study:

**Table 2.** Primers for yeast genetics.

| Name            | Sequence (5'-3')                                                                               |
|-----------------|------------------------------------------------------------------------------------------------|
| <i>GCN4</i> T F | AAATGAGGTTGCCAGATTAAAGAAATTAGTTGGCGAACGCCGGATCCCCGGGTAAATTAA                                   |
| <i>GCN4</i> T R | GAGAATGAAATAAAAAATATAAAATAAAAGGTAAATGAAAGAATTCGAGCTCGTTTAAAC                                   |
| <i>GCN4</i> T C | TCCACTGAAGAAGTTTCTCT                                                                           |
| <i>PEP4</i> D F | AAAGAAAAAAAAAAGCCTAGTGACCTAGTATTTAATCCAAATAAAATTCAAACAAAAACCAAAA<br>CTAACCGGATCCCCGGGTAAATTAA  |
| <i>PEP4</i> D R | TTGTTATCTACTTATAAAAGCTCTCTAGATGGCAGAAAAGGATAGGGCGGAGAAGTAAGAAAAGT<br>TTAGCGAATTCGAGCTCGTTTAAAC |
| <i>PEP4</i> D C | CGTTTTCAATATCTTGAGCTCCTCAATTGTATTTG                                                            |
| <i>VPS4</i> D F | TTGAGGACATGGAAGACAAAAATAAAGCAGCATAGAGTGCCTATAGTAGATGGGGTACAACAGCT<br>GAAGCTTCGTACGC            |
| <i>VPS4</i> D R | TTTTTTTATTTTTATTTTCATGTACACAAGAAATCTACATTAGCACGTTAATCAATTGAGCATAGG<br>CCACTAGTGGATCTG          |
| <i>VPS4</i> D C | GTGTCATCTGTTGCAGTCG                                                                            |
| <i>VAC8</i> D F | CAGGAACTGAGCAAACATAAGGGTGTTCTTTCTTCTGTACTATATATACATTTGCAACTCAGCTGA<br>AGCTTCGTACGC             |
| <i>VAC8</i> D R | AACTTCTGAGAAGAAAATTTTGATAAAAATTATAATGCCTAGTCCCGCTTTTGAAGAAAAGCATAG<br>GCCACTAGTGGAT            |
| <i>VAC8</i> D C | GAGCCCTTAAGGAGGACTC                                                                            |
| <i>ARG4</i> D F | GCTCAAAAGCAGGTAACATATATAACAAGACTAAGGCAAACCAGCTGAAGCTTCGTACGC                                   |
| <i>ARG4</i> D R | CCAGACCTGATGAAATTCTTGCGCATAACGTCGCCATCTGGCATAGGCCACTAGTGGATCTG                                 |
| <i>ARG4</i> D C | CAGCGGTAGATGTAAGCC                                                                             |

|                  |                                                                                        |
|------------------|----------------------------------------------------------------------------------------|
| <i>ATG9</i> T F  | CTTGTTAAAGAGTATTACAAGAAGTCTGACGTCGGAAGACGGATCCCCGGGTAAATTAA                            |
| <i>ATG9</i> T R  | ATATAGTTATATTGGATGATGTACACGACACAGTCTGCCGAATTCGAGCTCGTTTAAAC                            |
| <i>ATG9</i> T C  | CCGAAGACCATAGCGATAAAG                                                                  |
| <i>ATG1</i> D F  | ATTTGAAGCTACCCCATATTTTCAAATCTCTTTTACAACACCAGACGAGAAATTAAGAAACAGCTG<br>AAGCTTCGTACGC    |
| <i>ATG1</i> D R  | AGATACTTGAAAATATAGCAGGTCATTTGTACTTAATAAGAAAACCATATTATGCATCACGCATAG<br>GCCACTAGTGGATCTG |
| <i>ATG1</i> D C  | TCCCCCATCAGCATCAGTTTGTG                                                                |
| <i>SML1</i> D F  | CCTTTGTGATCTTACGGTCTCACTAACCTCTCTTCAACTGCTCAATAATTTCCCGCTCAGCTGAAGC<br>TTCGTACGC       |
| <i>SML1</i> D R  | GAAAAGAACAGAACTAGTGGGAAATGGAAAGAGAAAAGAAAAGAGTATGAAAGGAACTGCATAG<br>GCCACTAGTGGATCTG   |
| <i>SML1</i> D C  | CATTGCCGTCGAACGTC                                                                      |
| <i>RAD53</i> D F | TCTTAAGCTTTAAAAAGAGAGAATAGTGAGAAAAGATAGTGTTACACAACATCAACTAAAAACAGCT<br>GAAGCTTCGTACGC  |
| <i>RAD53</i> D R | GGTATCTACCATCTTCTCTCTTAAAAAGGGGCAGCATTTTCTATGGGTATTTGTCCTTGGGCATAGG<br>CCACTAGTGGATCTG |
| <i>RAD53</i> D C | GCTCAGCACCTACCTAAATG                                                                   |
| <i>RAD53</i> A F | GGTAAAAAGGGCAAAATTGGACCAAACCTCAAAAGGCCCGAGAATTTGCAATTTTCGCTTCGTAC<br>GCTGCAGGTCGA      |
| <i>RAD53</i> A R | TATCTACCATCTTCTCTCTTAAAAAGGGGCAGCATTTTCTATGGGTATTTGTCCTTGGCATCGATGA<br>ATTCGAGCTCG     |
| <i>RAD53</i> A C | GCATGTATGAATCTCCGGC                                                                    |
| <i>MEC1</i> A F  | AGAAGCAACATCAGAAGACAATCTAAGCAAGATGTATATTGGTTGGCTTCCATTTTGGCTTCGTAC<br>GCTGCAGGTCGA     |
| <i>MEC1</i> A R  | TGCAGTGATGGTTAGATCAAGAGGAAGTTCGTCTGTTGCCGAAAATGGTGGAAAGTCGCATCGATG<br>AATTCGAGCTCG     |
| <i>MEC1</i> A C  | CATGGAACAGGTAGATAAATTTCC                                                               |



|                  |                                                                                    |
|------------------|------------------------------------------------------------------------------------|
| <i>CDC28</i> A F | CCCTATTAACCGGATTAGCGCCAGAAGAGCAGCCATCCACCCCTACTTCCAAGAATCACTTCGTAC<br>GCTGCAGGTCGA |
| <i>CDC28</i> A R | AGGCTATAATGACAGTGCAGTAGCATTTGTAATATAATAGCGAAATAGATTATAATGCCATCGATG<br>AATTCGAGCTCG |
| <i>CDC28</i> A C | GGACCAACCGTTAGGAGC                                                                 |
| <i>DED1</i> A F  | TGGGGTAACAGCGGTGGTTCAAACAACCTCTTCTTGGTGGCTTCGTACGCTGCAGGTCGA                       |
| <i>DED1</i> A R  | GCAGAAAACGAAGAATCCTCACCCCTAGTTTGTCTGAAACATCGATGAATTCGAGCTCG                        |
| <i>DED1</i> A C  | GAGCTACCGCCATTCATG                                                                 |
| RA               | TCGACCTGCAGCGTACGAAG                                                               |
| RD               | GCGTACGAAGCTTCAGCTG                                                                |
| RT               | TTAATTAACCCGGGGATCCG                                                               |

A, AID tagging; C, PCR-based forward detection primer; D, deletion; F, forward primer; R, reverse primer; RA, PCR-based reverse detection primer for AID tagging; RD, PCR-based reverse detection primer for deletion; RT, PCR-based reverse detection primer for tagging; T, tagging.

**Table 3.** Primers for qRT-PCR.

| Name          | Sequence (5'-3')                 |
|---------------|----------------------------------|
| ATG1 F        | ATCTAAGATGGCCGCACATATG           |
| ATG1 R        | AGGGTAGTCACCATAGGCATTC           |
| ATG9 F        | CGTACTAACAGAGTCTTTCCTTG          |
| ATG9 R        | CTAAGACACCACCCTTATTGAG           |
| ALG9 F        | CACGGATAGTGGCTTTGGTGAACAATTAC    |
| ALG9 R        | TATGATTATCTGGCAGCAGGAAAGAACTTGGG |
| ATG1 5'-UTR F | TAGGCCGAGGTTAATTCTAGAACG         |
| ATG1 5'-UTR R | ATAGTACTGTTCTCTGTTTCCCCAGA       |
| ATG1 CDS F    | GAGCTTCCAATCATTGAGGTTATTC        |
| ATG1 CDS R    | CTATTCTTTGGGCTGGATCAAATGTC       |
| ATG1 3'-UTR F | GAGGCAGAAGATGAACCACCAAA          |
| ATG1 3'-UTR R | GTAAAGCATTTCGAGAGTAGCATAAC       |
| PGK1 CDS      | GAAGGACAAGCGTGTCTTCATCAG         |
| PGK1 CDS      | CGTACTTGATGGTTGGCAAAGCAG         |
| hGAPDH F      | GTCTCCTCTGACTTCAACAGCG           |
| hGAPDH R      | ACCACCCTGTTGCTGTAGCCAA           |
| hULK1 F       | GCAAGGACTCTTCCTGTGACAC           |
| hULK1 R       | CCACTGCACATCAGGCTGTCTG           |

**Table 4.** Primers for shRNA-mediated knockdown.

| Name  | Sequence (5'-3')                                               |
|-------|----------------------------------------------------------------|
| DDX3F | CCGGCGGAGTGATTACGATGGCATTCTCGAGAATGCCATCGTAATCACTC<br>CGTTTTT  |
| DDX3R | CCGGCGTAGAATAGTCGAACAAGATCTCGAGATCTTGTTTCGACTATTCTA<br>CGTTTTT |

## References

113. Li Z, Vizeacoumar FJ, Bahr S, et al. Systematic exploration of essential yeast gene function with temperature-sensitive mutants. *Nat Biotechnol.* 2011 Apr;29(4):361-7. doi: 10.1038/nbt.1832. PubMed PMID: 21441928; PubMed Central PMCID: PMC3286520.
